# Supplementary material for: Ru-anchoring Co-MOF-derived porous Ru-Co3O4 nanomaterials for enhanced oxygen evolution activity and structural stability
Source: Royal Society of Chemistry journal article supplement (doi:10.1039/d4qi02061h), 2024-01-01
Supplement: d4qi02061h1.pdf [file d4qi02061h1.pdf]

## Supporting Information

### **Ru-anchoring Co-MOF-derived porous Ru-Co<sub>3</sub>O<sub>4</sub> nanomaterials for enhanced oxygen evolution activity and structural stability**

Nan Li,<sup>a</sup> Lujiao Mao,<sup>a</sup> Yuting Fu,<sup>a</sup> Haoran Wang,<sup>a</sup> Yuchang Shen,<sup>a</sup> Xuemei Zhou,<sup>a,\*</sup>

Qipeng Li,<sup>b,\*</sup> and Jinjie Qian<sup>a,\*</sup>

<sup>a</sup>Key Laboratory of Carbon Materials of Zhejiang Province, College of Chemistry and Materials Engineering, Wenzhou University, Wenzhou 325035, Zhejiang, P. R. China

<sup>b</sup>College of Chemistry and Chemical Engineering, Zhaotong University, Zhaotong 657000, Yunnan, P. R. China

\*Corresponding author

E-mail: zxm.mei@163.com (X. Zhou), qpli@ztu.edu.cn (Q. Li);

jinjieqian@wzu.edu.cn (J. Qian)

## 1. Experimental Details

### 1.1 Reagents and Materials.

Unless otherwise specified, chemicals are reagent grade and used without processing. Cobalt(II) acetate tetrahydrate ( $\text{Co}(\text{CH}_3\text{COO})_2 \cdot 4\text{H}_2\text{O}$ , 99.5%, Aladdin), biphenyl-3,3',5,5'-tetracarboxylic acid ( $\text{H}_4\text{BPTC}$ , 98.0%, Jinan Henghua Technology Company), polyvinylpyrrolidone (PVP, ~58000, Aladdin), Ruthenium(III) chloride anhydrous ( $\text{RuCl}_3$ , Aladdin), N-Methylformamide (NMF, 99%, Aladdin), de-ionized water (18 M $\Omega$ ), Nitric acid concentrated solution ( $\text{HNO}_3$ , 70%, Aladdin), and ethanol (EtOH, 95%, Aladdin).

### 1.2 Synthesis of CoOF-1 ( $[\text{Co}_2(\text{OH})_2(\text{BPTC})]$ )

The mixture of  $\text{Co}(\text{CH}_3\text{COO})_2 \cdot 4\text{H}_2\text{O}$  (30 mg, 0.12 mmol),  $\text{H}_4\text{BPTC}$  (0.05 mmol, 15 mg), NMF (2 mL), and EtOH (1 mL) are added to a 35 mL pressure-resistant tube. Meanwhile,  $\text{HNO}_3$  (0.3 mL) solution can adjust the mixture to be acidic. The reaction is then in an aluminum block bath to 140 °C for 4h. After cooling to room temperature, the product was collected and centrifuged, washed three times with EtOH, and then the filtered solid was dried under vacuum at 85 °C overnight to obtain pure CoOF-1 in high yield.

### 1.3 Synthesis of Ru-CoOF-1

The mixture of CoOF-1 (30mg) and EtOH (3 mL) are added to a reaction kettle. Afterwards, certain volume of  $\text{RuCl}_3$  solution ( $\text{Ru wt.}\% = 5 \text{ mg mL}^{-1}$ ) was transferred into the former mixture. Then placing them in a oven and heat at 140 °C for 6 h at a temperature increase rate of 1 °C/min. After naturally cooling down to room

temperature, the products are collected and centrifuged, washed three times with EtOH, and then the filtered solid was dried under vacuum at 85 °C overnight to obtain Ru-CoOF-1.

#### **1.4 Syntheses of Ru-Co<sub>3</sub>O<sub>4</sub>**

The as-prepared Ru-CoOF-1 were weighted and placed in the muffle furnace. Then the temperature was set to 350 °C at a heating rate of 5 °C min<sup>-1</sup> in air atmosphere and maintained for 6 h. The black powder was obtained after cooling to room temperature. According to the mass ratio of RuCl<sub>3</sub> to CoOF-1 (1:100, 5:100, and 10:100) in the preparation, the finally obtained Ru-incorporated Co<sub>3</sub>O<sub>4</sub> catalysts were designated as Ru-Co<sub>3</sub>O<sub>4-x</sub> (x = 1, 5, and 10), respectively. The sample mainly involved in the characterization in this paper is Ru-Co<sub>3</sub>O<sub>4-5</sub>, which is referred to as Ru-Co<sub>3</sub>O<sub>4</sub> for short.

## **2. Material Characterization**

The microscopic and nanostructured morphologies of all samples are characterized by scanning electron microscopy (SEM, JEOL JSM-6700F, 10 kV). The powder X-ray diffraction (PXRD) patterns are collected on a Bruker D8 Advance at 40 kV and 40 mA with Cu K $\alpha$  radiation ( $\lambda=0.154$  nm). Thermogravimetric analysis (TGA) is implemented under a flowing N<sub>2</sub> atmosphere by using a NETZSCH STA 449C unit. Raman spectrometer is investigated on LabRAM HR Evolution from the 532 nm line of an Ar-ion laser. X-ray photoelectron spectroscopy (XPS) is recorded on a Thermo Scientific ESCALAB 250. Fourier transform infrared spectroscopy (FT-IR) spectra are carried on in the model of PerkinElmer Frontier MIR. N<sub>2</sub> adsorption/desorption

isotherms are used to characterize the determine specific surface areas and pore distribution of samples based on the Brunauer-Emmett-Teller method (BET, Micrometrics ASAP 2020 system).

### 3. Electrochemical measurements

All electrochemical data were collected via the CHI760E and/or Autolab electrochemical workstation. OER measurements were performed in 1.0 M KOH solution using a typical three-electrode system, the GCE (glassy carbon electrode) with catalyst ink, platinum mesh, and Hg/Hg<sub>2</sub>Cl<sub>2</sub> electrode as the working electrode, counter electrode, and reference electrode, respectively. At the same time, we chose Hg/Hg<sub>2</sub>Cl<sub>2</sub> as the reference electrode to ensure accuracy and reproducibility in alkaline media. All electrochemical tests in our work were performed without iR correction.

Briefly, the homogeneous catalyst ink was prepared by dispersing 2.5mg of catalyst powder into a mixed solution containing 75  $\mu$ L of DI H<sub>2</sub>O, 150  $\mu$ L of ethanol and 25  $\mu$ L of Nafion (5 wt.%), and then underwent an ultrasonic treatment for 1 h. 6  $\mu$ L of the resultant catalyst ink was drop-casted onto the GCE electrode surface with a loading value of 0.85 mg cm<sup>-2</sup>, and dried at room temperature. As a comparison, commercial RuO<sub>2</sub> also was tested. The linear sweep voltammetry (LSV) is collected with a scan rate of 5 mV s<sup>-1</sup> after initial 40 circles cyclic voltammogram (CV) progress at a scan rate of 100 mV s<sup>-1</sup> to have a stable CV curve. The electrochemical double-layer capacitance ( $C_{dl}$ ) is measured by using CV in a non-faradaic region (0.91-1.01 V vs. RHE) at different scan rates of 20, 40, 60, 80 and 120 mV s<sup>-1</sup>.

Electrocatalytic stability is made by using amperometric curve (i-t) at a potential of 1.5 V vs. RHE for 48 h.

#### 4. Computational details

The construction models of CoOF-1 and Ru-CoOF-1 composites are optimized by the CASTEP module of Accelrys Materials Studio 2020 software to obtain the geometry optimizations structure with minimized energy, and the function is selected as Perdew-Burke Ernzerhof (PBE) in Generalized Gradient Approximation (GGA). The Brillouin zone is sampled with  $2 \times 2 \times 2$  k-points and cut-off energy of 489.80 eV is used. The formation energies ( $E_f$ ) of Ru with different composites is calculated by the equation:

$$E_f = E_{\text{Ru+sub}} - E_{\text{Ru}} - E_{\text{sub}} \quad (1)$$

where  $E_{\text{Ru+sub}}$ ,  $E_{\text{Ru}}$ , and  $E_{\text{sub}}$  are the energy of the CoOF-1 substance combined with the ruthenium, ruthenium atom, and CoOF-1 substance, respectively.

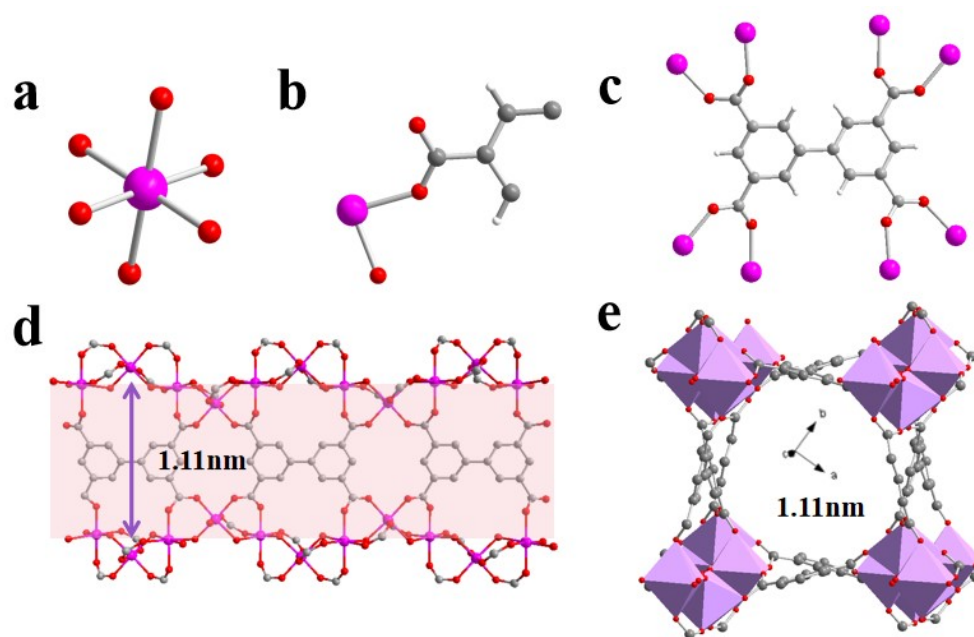

**Fig. S1** a) The asymmetry unit, b) 6-coordinated Co(II) center, c) the coordination condition of fully deprotonated BPTC<sup>4-</sup> ligand, d-e) the tetragonal channels of CoOF-1. (H atoms are shown in white, C atoms in gray, O atoms in red, Co ions in pink).

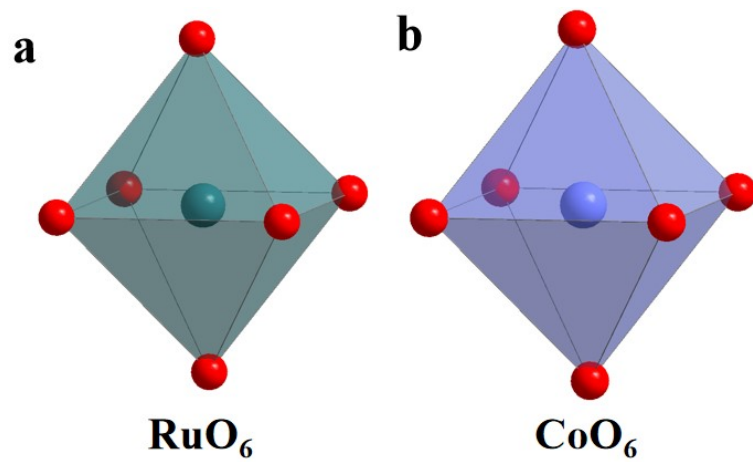

**Fig. S2** The similar coordination environments of 6-coordinated (a) Ru and (b) Co.

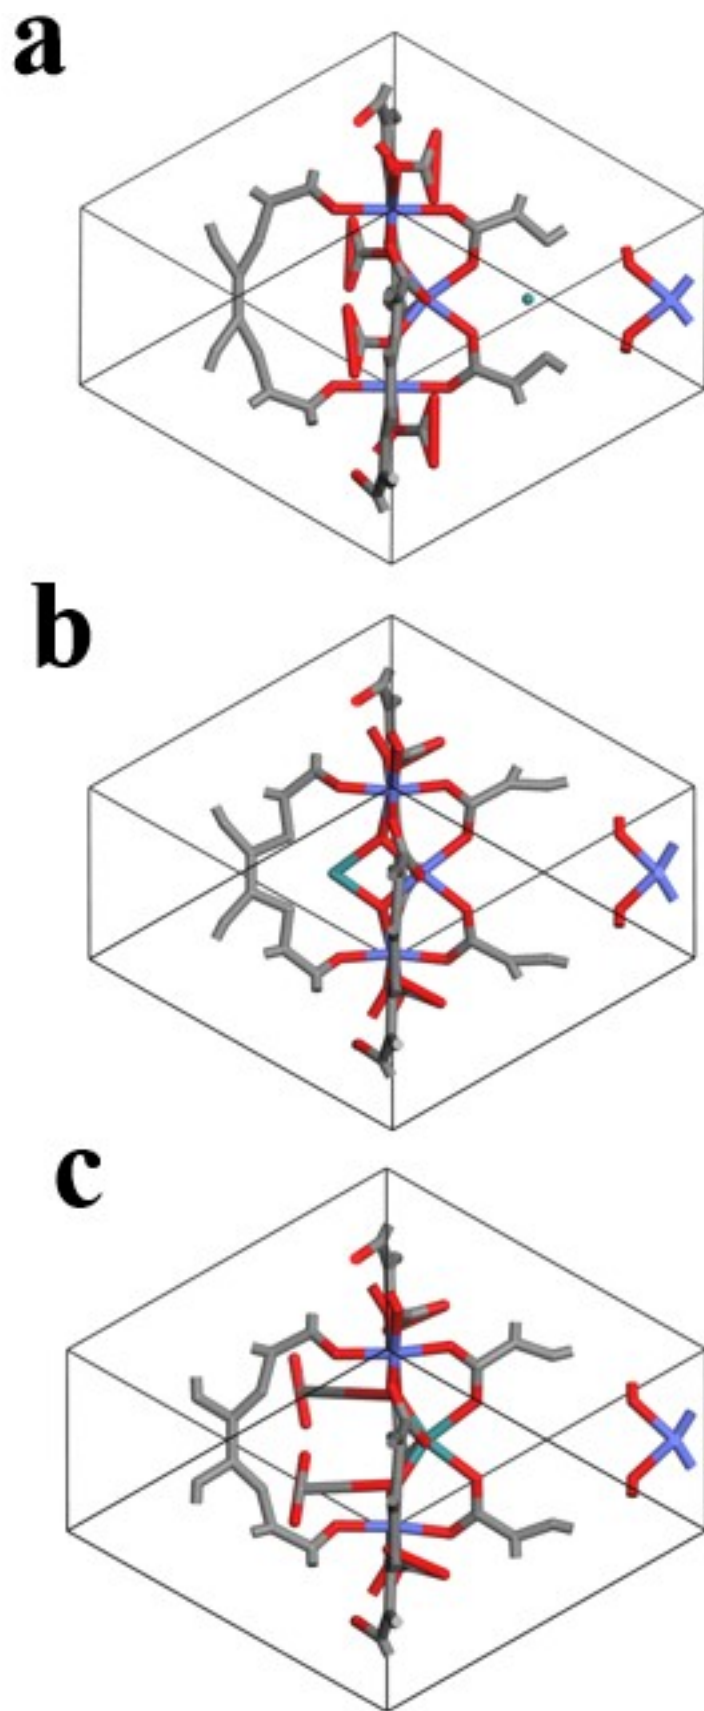

**Fig. S3** Three kinds of Ru atoms are anchored in the structure of **CoOF-1**: a) in the pore of **CoOF-1**, b) at the edge of Co-O chain, c) in the lattice of Co-O chain.



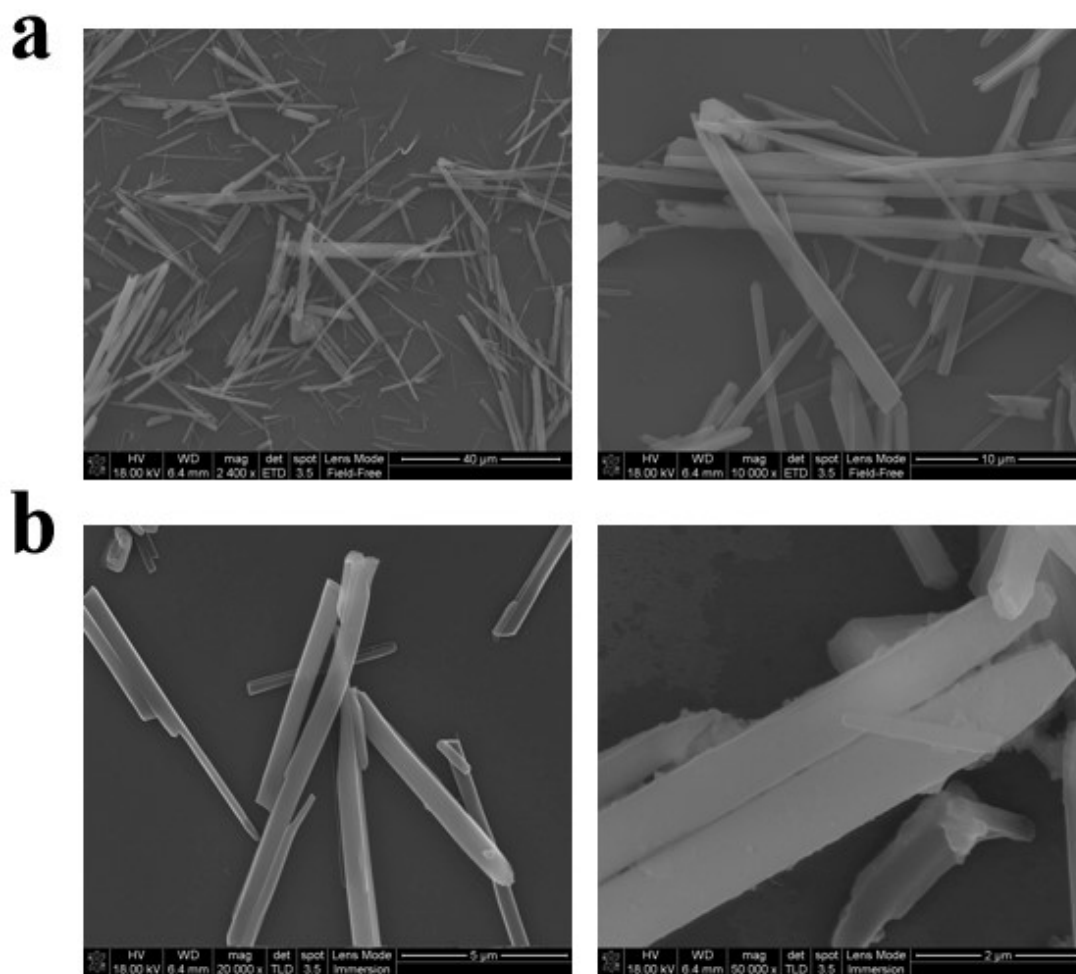

**Fig. S4** SEM images of (a) CoOF-1 and (b) Ru-CoOF-1.

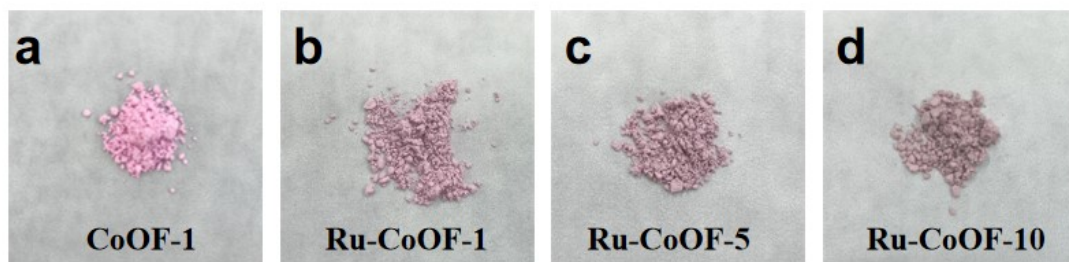

**Fig. S5** Digital photographs of (a) **CoOF-1**, (b) **Ru-CoOF-1**, (c) **Ru-CoOF-5** and (d) **Ru-CoOF-10**.

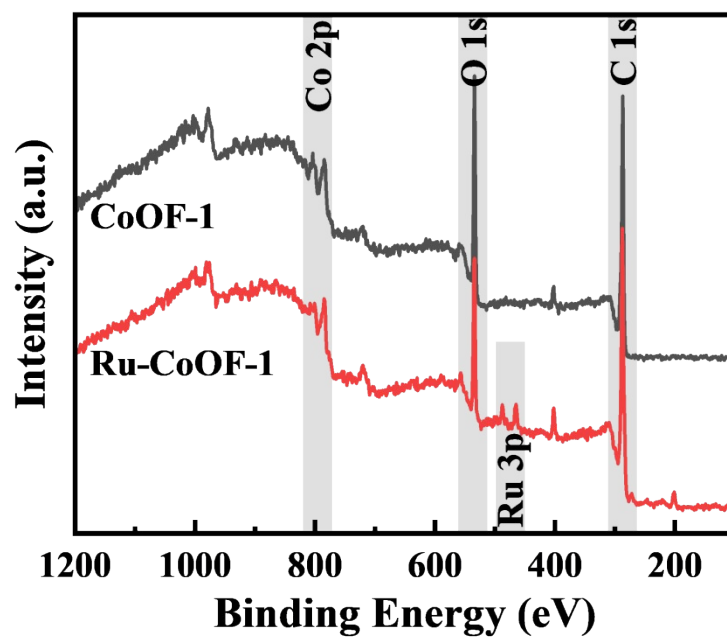

**Fig. S6** The full XPS survey spectra of CoOF-1 (gray) and Ru-CoOF-1 (red).

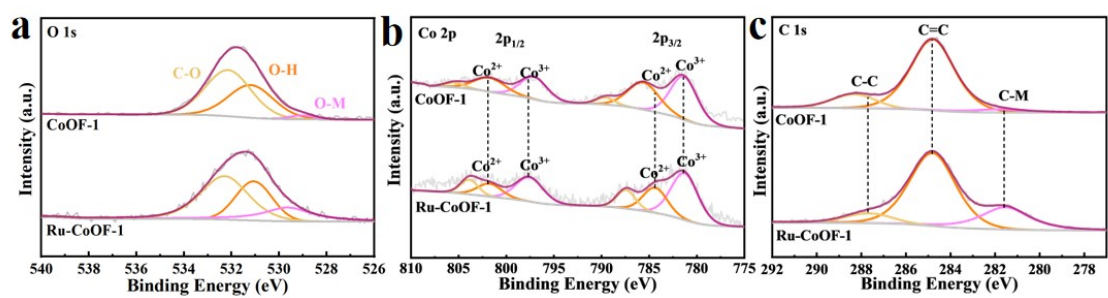

**Fig. S7** The high-resolution XPS spectra of a) O 1s, b) Co 2p, and c) C 1s for **CoOF-1** and **Ru-CoOF-1**.

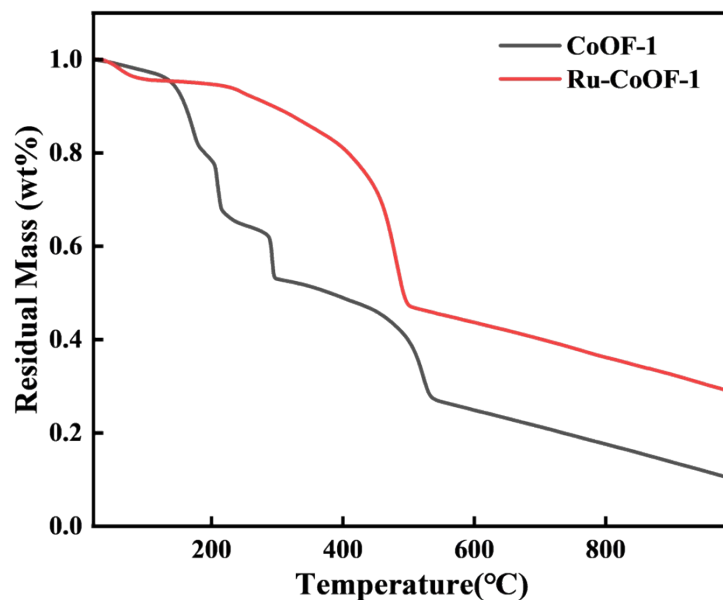

**Fig. S8** TGA data of **CoOF-1** and **Ru-CoOF-1**.

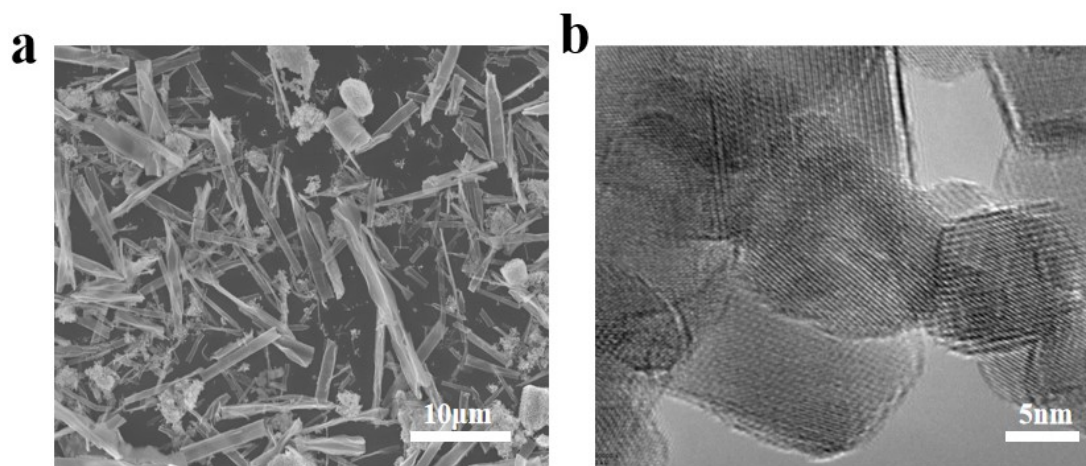

**Fig. S9** (a) SEM and (b) HR-TEM images of MOF-derived  $\text{Co}_3\text{O}_4$ .

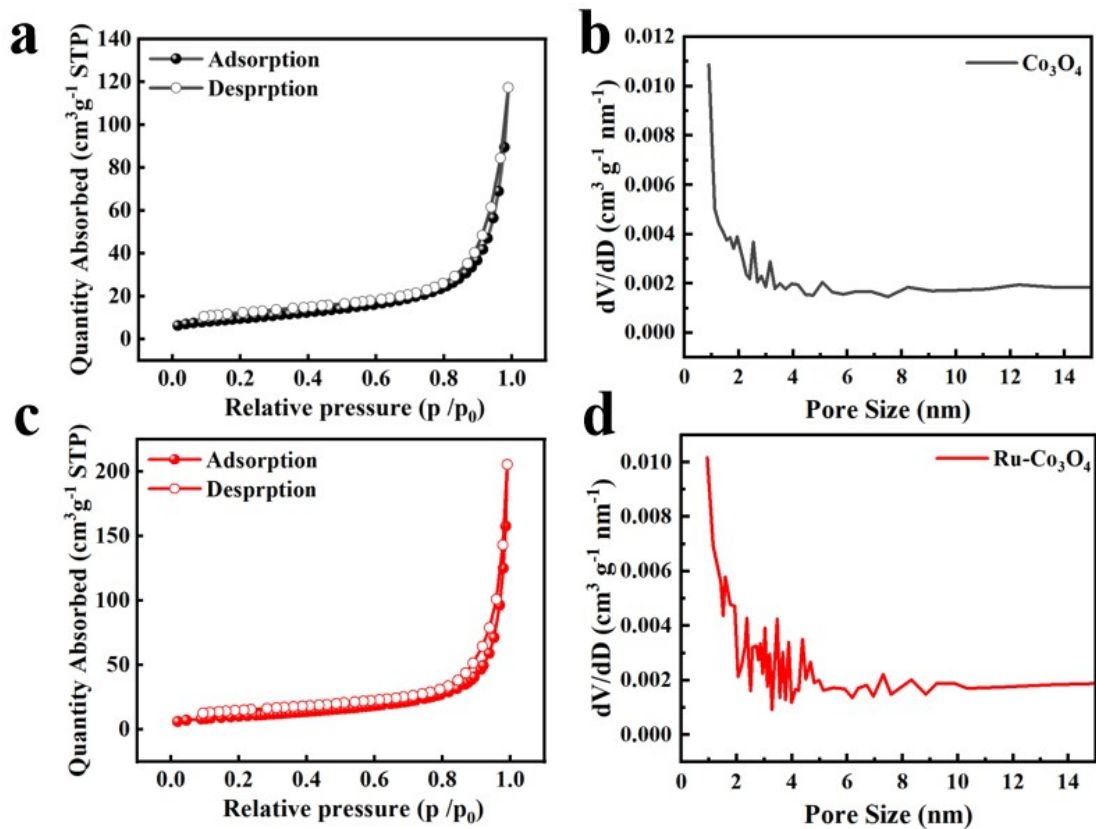

**Fig. S10** a) N<sub>2</sub> isotherms, b) Pore size distribution analysis of **Co<sub>3</sub>O<sub>4</sub>**, c) N<sub>2</sub> isotherms, d) Pore size distribution analysis of **Ru-Co<sub>3</sub>O<sub>4</sub>**.

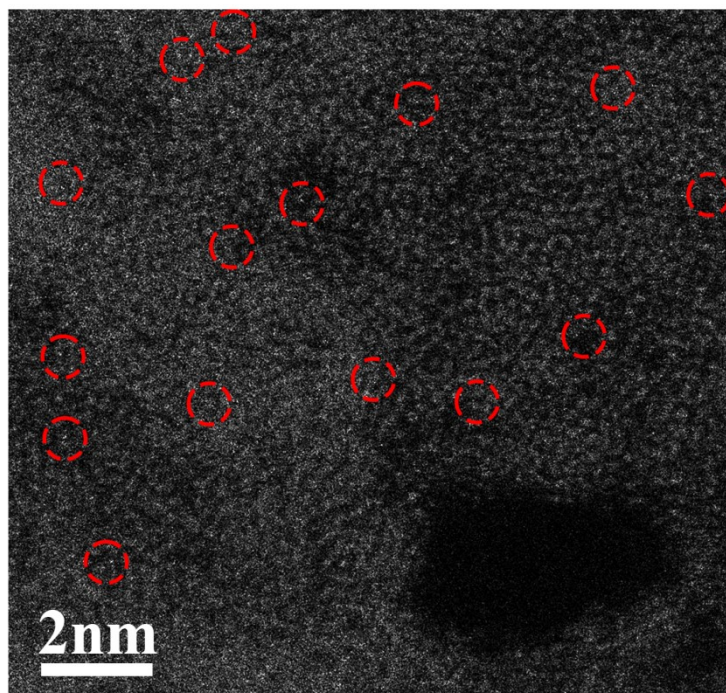

**Fig. S11** HAADF-STEM images of MOF-derived Ru-doped  $\text{Co}_3\text{O}_4$  (**Ru-Co<sub>3</sub>O<sub>4</sub>-5**).



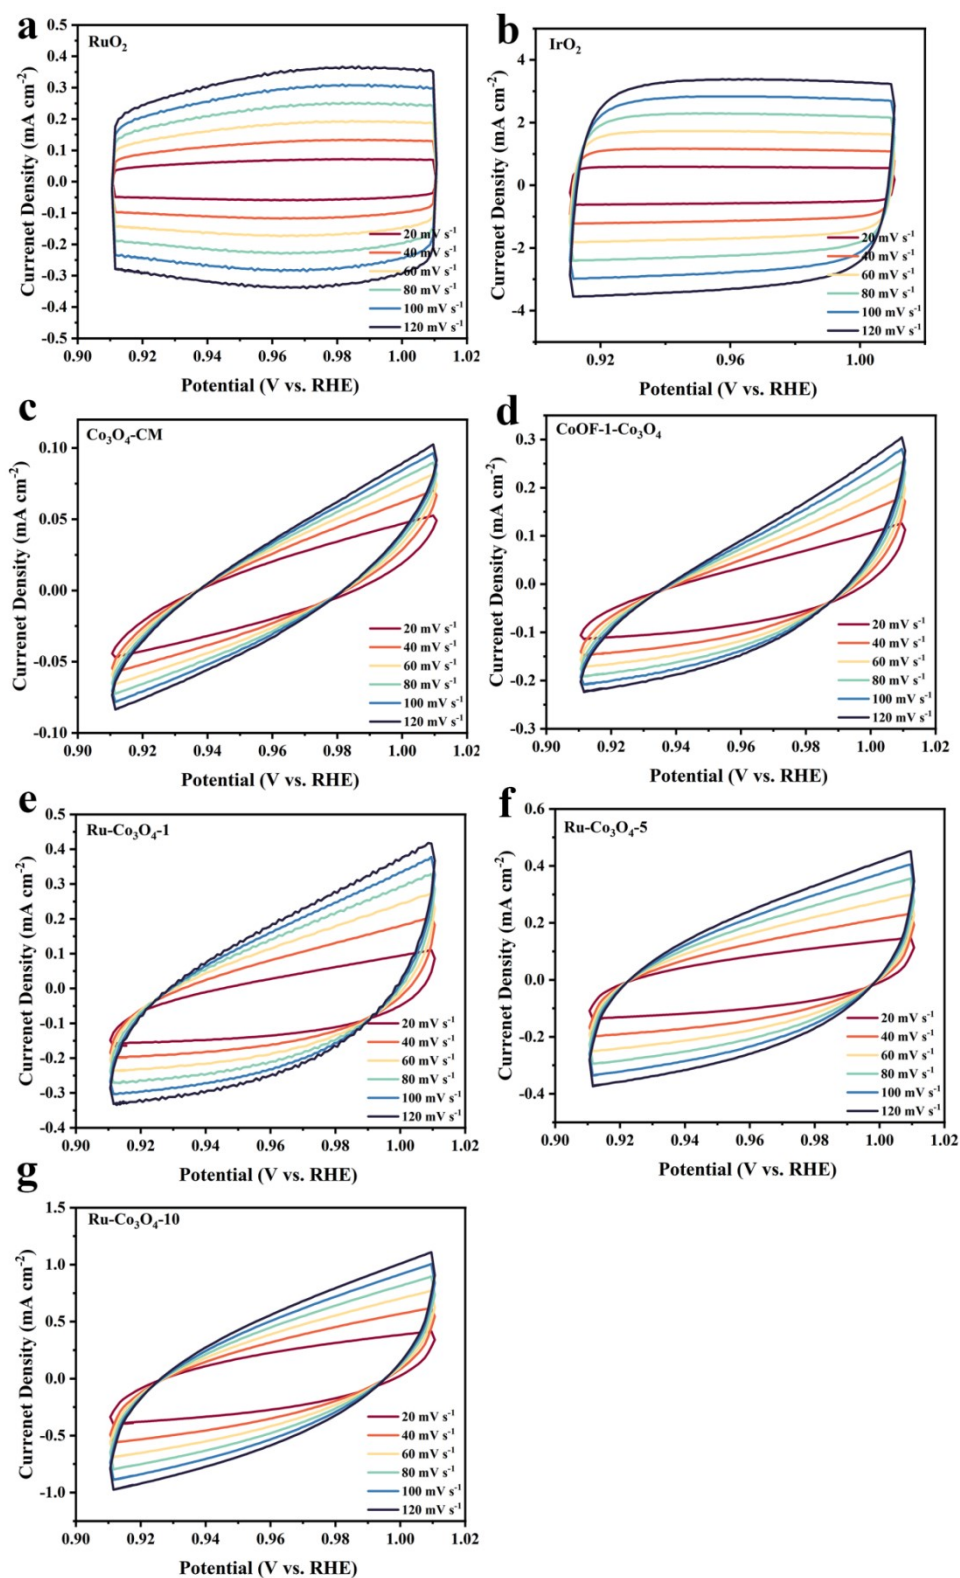

**Fig. S12** The double-layer capacitance ( $C_{dl}$ ) is calculated from the cyclic voltammograms of the a)  $\text{RuO}_2$ , b)  $\text{IrO}_2$ , c)  $\text{Co}_3\text{O}_4\text{-CM}$ , d)  $\text{CoOF-1-Co}_3\text{O}_4$  derived  $\text{Co}_3\text{O}_4$ , e)  **$\text{Ru-Co}_3\text{O}_4\text{-1}$** , f)  **$\text{Ru-Co}_3\text{O}_4\text{-5}$** , g)  **$\text{Ru-Co}_3\text{O}_4\text{-10}$** .

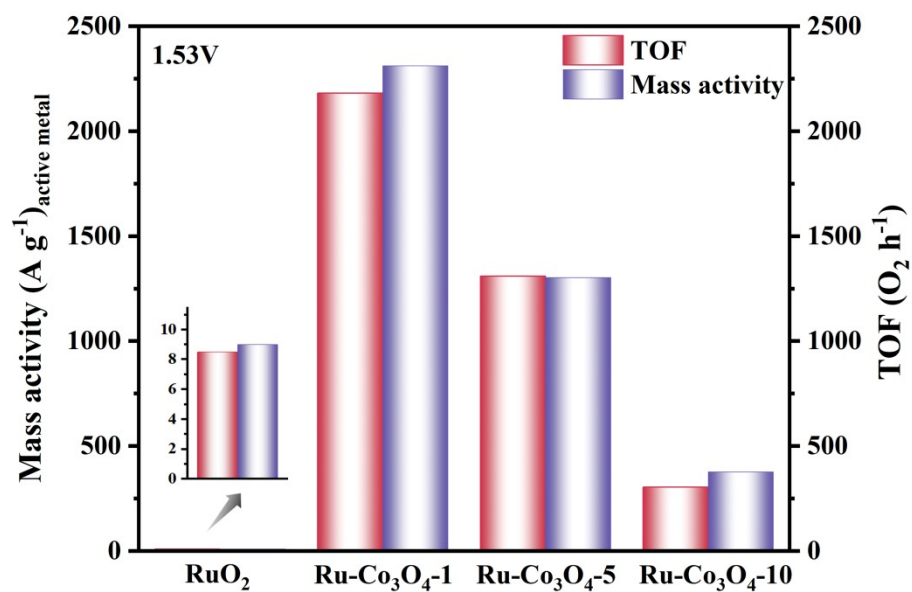

**Fig. S13.** Mass activity and turnover frequency (TOF) of  $\text{Ru-Co}_3\text{O}_4\text{-1}$ ,  $\text{Ru-Co}_3\text{O}_4\text{-5}$ ,  $\text{Ru-Co}_3\text{O}_4\text{-10}$  and  $\text{RuO}_2$ .

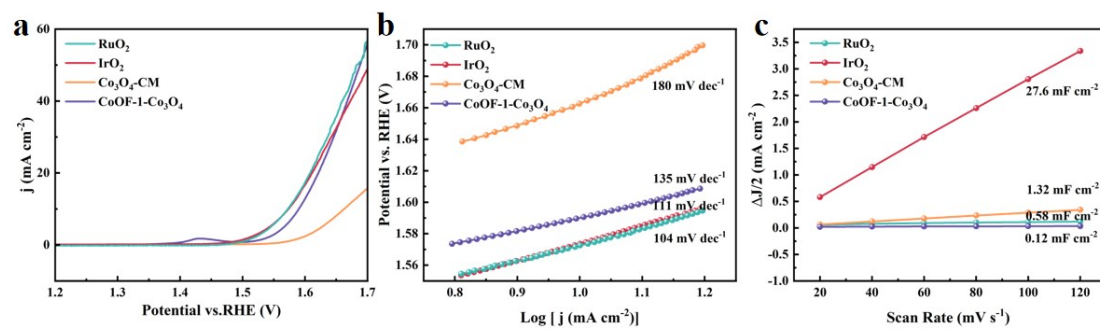

**Fig. S14.** (a) LSV curves, (b) Tafel slopes, (c) C<sub>dl</sub> profiles of MOF-derived OER catalysts and commercial catalysts.

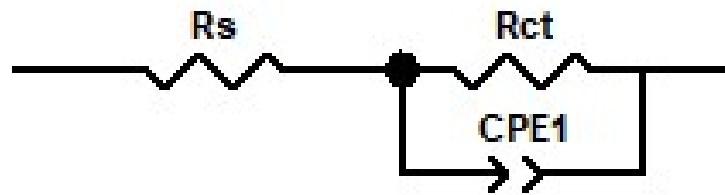

**Fig. S15** The equivalent electrical circuit for EIS data ( $R_s$ : solution resistance;  $R_{ct}$  and  $CPE1$ : resistance and CPE impedance of electrical double layer at the interface of activated product layer and GCE substrate).

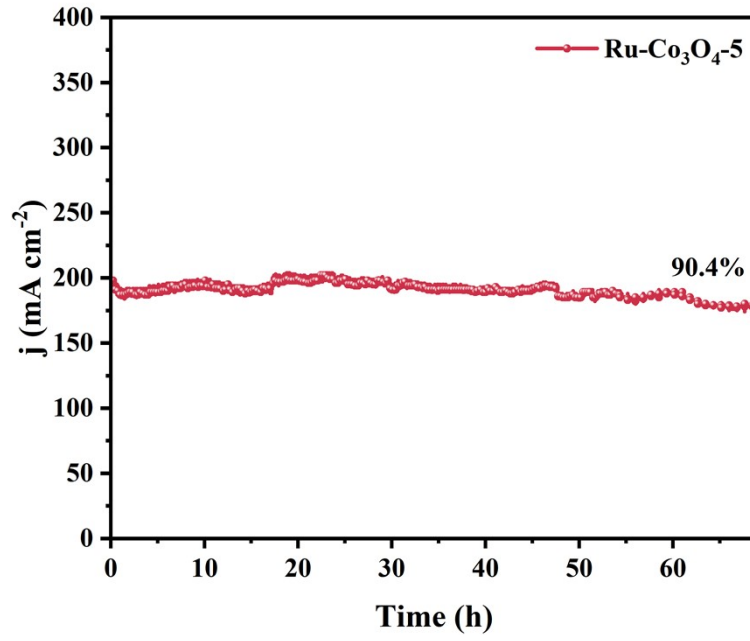

**Fig. 16.** The current density retention after long-term durability of OER test.

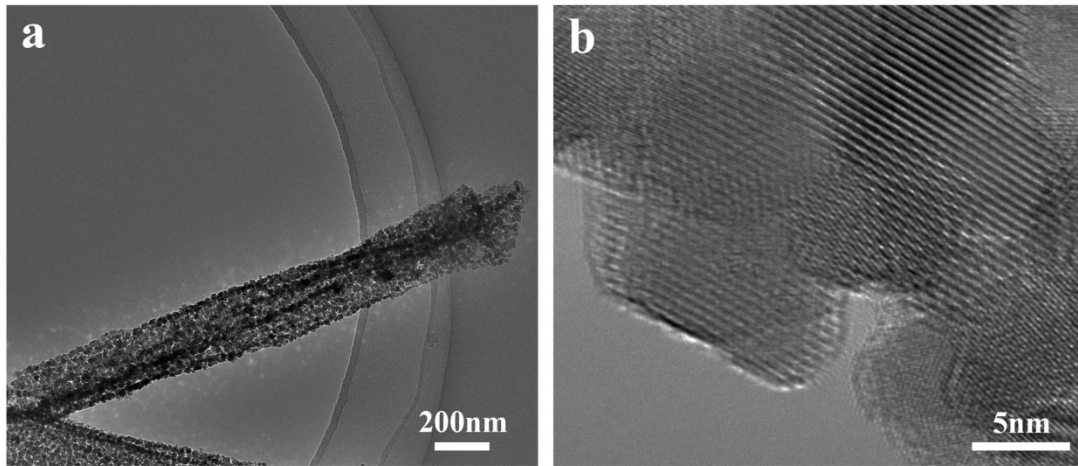

**Fig. 17.** a) and b) TEM images of Ru-Co<sub>3</sub>O<sub>4</sub>-5 after long-term test.

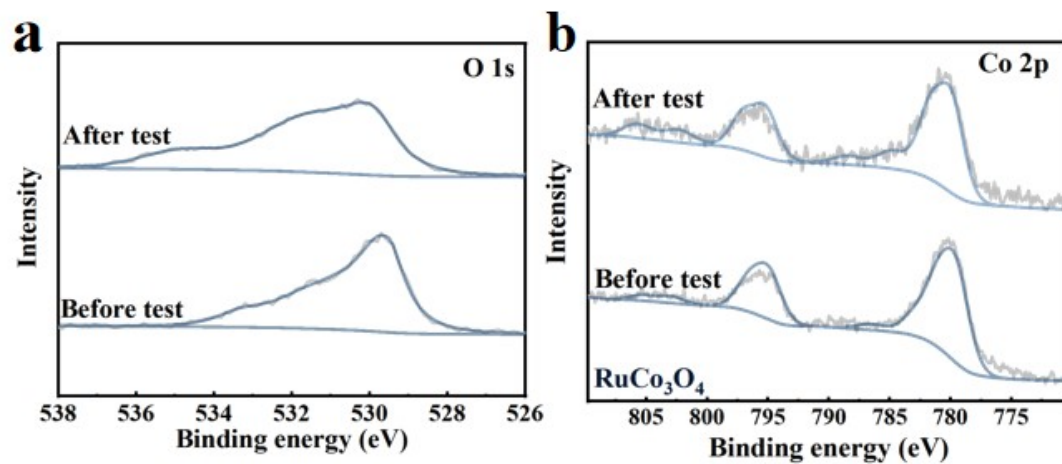

**Fig. S18** a) O 1s and b) Co 2p XPS spectra of the **Ru-Co<sub>3</sub>O<sub>4</sub>-5** before and after the chronopotentiometry test.

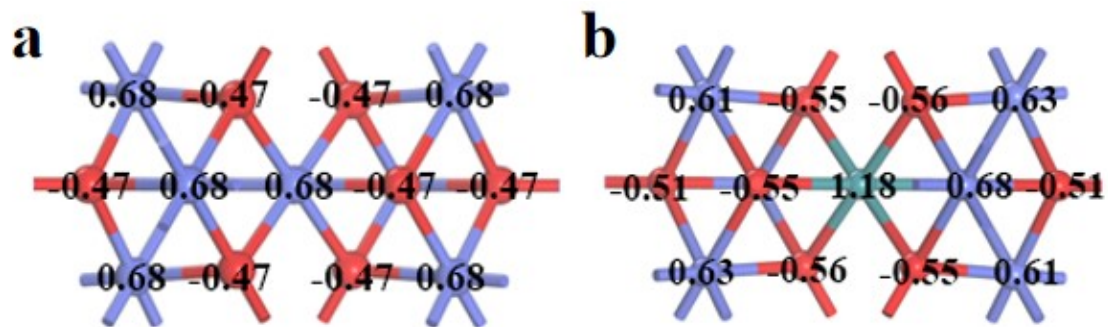

**Fig. S19** The electron distribution in the (a)  $\text{Co}_3\text{O}_4$  model and (b)  $\text{Ru-Co}_3\text{O}_4$  model.



**Table S1 Summary of Crystal Data for CoOF-1.**

| Items                             | CoOF-1 <sup>Ref</sup>                                                          |
|-----------------------------------|--------------------------------------------------------------------------------|
| CCDC                              | 1912147                                                                        |
| Formula                           | (C <sub>18</sub> H <sub>8</sub> Co <sub>2</sub> O <sub>12</sub> ) <sub>n</sub> |
| Mass                              | 547.15                                                                         |
| crystal system                    | Tetragonal                                                                     |
| Space group                       | <i>I4<sub>1</sub>22</i>                                                        |
| a(Å)                              | 15.327 (3)                                                                     |
| b(Å)                              | 15.327 (3)                                                                     |
| c(Å)                              | 12.270 (3)                                                                     |
| α(°)                              | 90.00                                                                          |
| β(°)                              | 90.00                                                                          |
| γ(°)                              | 90.00                                                                          |
| V(Å <sup>3</sup> )                | 2882.6 (13)                                                                    |
| T(K)                              | 296                                                                            |
| Z                                 | 8                                                                              |
| F(000)                            | 1128.0                                                                         |
| R <sub>int</sub>                  | 1.158                                                                          |
| R <sub>1</sub> (I>2σ(I))          | 0.0310 (1749)                                                                  |
| wR <sub>2</sub> (all reflections) | 0.0866 (1811)                                                                  |

**Ref:** Li Zhong, Junyang Ding, Xian Wang, Lulu Chai, Ting-Ting Li, Kongzhao Su, Yue Hu, Jinjie Qian, Shaoming Huang CCDC 1912147: Experimental Crystal Structure Determination, 2020, DOI: [10.5517/ccdc.csd.cc225r56](https://doi.org/10.5517/ccdc.csd.cc225r56)

**Table S2 Micropore Volume, Total Pore Volume and Specific Surface Area over All Prepared Catalysts.**

| Samples                              | Micropore volume<br>(cm <sup>3</sup> g <sup>-1</sup> ) | Total pore volume<br>(cm <sup>3</sup> g <sup>-1</sup> ) | Specific surface<br>area (m <sup>2</sup> g <sup>-1</sup> ) |
|--------------------------------------|--------------------------------------------------------|---------------------------------------------------------|------------------------------------------------------------|
| <b>CoOF-1</b>                        | 0.0116                                                 | 0.1120                                                  | 46.4348                                                    |
| <b>Ru-CoOF-1</b>                     | 0.0189                                                 | 0.1910                                                  | 34.4143                                                    |
| <b>Co<sub>3</sub>O<sub>4</sub></b>   | 0.0145                                                 | 0.1383                                                  | 33.7280                                                    |
| <b>RuCo<sub>3</sub>O<sub>4</sub></b> | 0.0150                                                 | 0.3181                                                  | 37.5978                                                    |

**Table S3 The Deconvolution Data of Co, O, and Ru Atoms in Ru-Co<sub>3</sub>O<sub>4</sub> and Co<sub>3</sub>O<sub>4</sub>.**

| <b>Species</b>                          | <b>Ru-Co<sub>3</sub>O<sub>4</sub></b> | <b>Co<sub>3</sub>O<sub>4</sub></b> |
|-----------------------------------------|---------------------------------------|------------------------------------|
| <b>Co<sup>3+</sup> 2p<sub>3/2</sub></b> | 779.4                                 | 779.7                              |
| <b>Co<sup>2+</sup> 2p<sub>3/2</sub></b> | 781.2                                 | 781.3                              |
| <b>Co<sup>3+</sup> 2p<sub>1/2</sub></b> | 794.7                                 | 794.7                              |
| <b>Co<sup>2+</sup> 2p<sub>1/2</sub></b> | 796.4                                 | 796.4                              |
| <b>O<sub>L</sub></b>                    | 529.8                                 | 529.9                              |
| <b>O<sub>V</sub></b>                    | 531.6                                 | 532.0                              |
| <b>O<sub>C</sub></b>                    | 533.2                                 | 533.2                              |
| <b>Ru 3p</b>                            | 463.0                                 | /                                  |

**Table S4 The Content of Ru in Ru-Co<sub>3</sub>O<sub>4</sub> by ICP-OES Measurement.**

| Catalysts                                | Relative content<br>of ruthenium<br>(wt.%) |
|------------------------------------------|--------------------------------------------|
| <b>Ru-Co<sub>3</sub>O<sub>4</sub>-1</b>  | 0.52                                       |
| <b>Ru-Co<sub>3</sub>O<sub>4</sub>-5</b>  | 3.05                                       |
| <b>Ru-Co<sub>3</sub>O<sub>4</sub>-10</b> | 8.26                                       |

**Table S5 The Electrochemical Data of Ru-Co<sub>3</sub>O<sub>4</sub> Series.**

| <b>Samples</b>                            | <b>Overpotential<br/>(mV, <math>\eta_{10}</math>)</b> | <b>Tafel slope<br/>(mV dec<sup>-1</sup>)</b> | <b>C<sub>dl</sub> value<br/>(mF cm<sup>-2</sup>)</b> | <b>charge transfer<br/>resistance (<math>\Omega</math>)</b> |
|-------------------------------------------|-------------------------------------------------------|----------------------------------------------|------------------------------------------------------|-------------------------------------------------------------|
| <b>Ru-Co<sub>3</sub>O<sub>4</sub>-1</b>   | 319                                                   | 121                                          | 1.58                                                 | 13.6                                                        |
| <b>Ru-Co<sub>3</sub>O<sub>4</sub>-5</b>   | 260                                                   | 84                                           | 3.17                                                 | 13.5                                                        |
| <b>Ru-Co<sub>3</sub>O<sub>4</sub>-10</b>  | 281                                                   | 96                                           | 2.78                                                 | 11.8                                                        |
| <b>RuO<sub>2</sub></b>                    | 342                                                   | 104                                          | 0.58                                                 | 17.2                                                        |
| <b>IrO<sub>2</sub></b>                    | 343                                                   | 111                                          | 27.6                                                 |                                                             |
| <b>CoOF-1-Co<sub>3</sub>O<sub>4</sub></b> | 360                                                   | 135                                          | 0.12                                                 | 15.3                                                        |
| <b>Co<sub>3</sub>O<sub>4</sub>.CM</b>     | 433                                                   | 180                                          | 1.32                                                 |                                                             |

**Table S6 OER Performance Comparison between Ru-Co<sub>3</sub>O<sub>4</sub> and Other Electrode Materials.**

| Samples                                 | Electrolyte | $\eta_{10}$<br>(mV) | Tafel slope<br>(mV dec <sup>-1</sup> ) | Reference                                                  |
|-----------------------------------------|-------------|---------------------|----------------------------------------|------------------------------------------------------------|
| <b>Ru-Co<sub>3</sub>O<sub>4</sub>-5</b> | 1.0 M KOH   | 260                 | 84                                     |                                                            |
| Ru-Co <sub>3</sub> O <sub>4</sub> -1    | 1.0 M KOH   | 318                 | 121                                    | <b>This Work</b>                                           |
| Ru-Co <sub>3</sub> O <sub>4</sub> -10   | 1.0 M KOH   | 280                 | 96                                     |                                                            |
| Ir0.33@Co <sub>3</sub> O <sub>4</sub>   | 1 M KOH     | 296                 | 68                                     | ACS Catal., <b>2022</b> ,<br>12, 13482–13491.              |
| Co <sub>3</sub> O <sub>4</sub> NC       | 1 M KOH     | 380                 | 101                                    | Angew. Chem., Int.<br>Ed., <b>2020</b> , 59,<br>7245–7250. |
| Ir/Co                                   | 1 M KOH     | 273                 | 99                                     | J. Mater. Chem. A<br><b>2019</b> , 7, 8376-8383.           |
| IrCo-NC                                 | 0.1 M KOH   | 330                 | 79                                     | ACS Catal. <b>2021</b> , 11,<br>8837-8846                  |
| Fe adsorbed CoOx                        | 1 M KOH     | 309                 | 27.6                                   | ACS Catal. <b>2018</b> , 8,<br>807-814                     |
| Co/C <sub>3</sub> N <sub>4</sub> @CNT   | 1 M KOH     | 380                 | 68.4                                   | J. Am. Chem. Soc.<br><b>2017</b> , 139, 3336-              |

|                                         |         |     |      |                                                  |
|-----------------------------------------|---------|-----|------|--------------------------------------------------|
|                                         |         |     |      | 3339                                             |
| CoIr-0.2                                | 1 M KOH | 235 | 70.2 | <i>Adv. Mater.</i> <b>2018</b> ,<br>30, 1707522. |
| Zn <sub>0.2</sub> Co <sub>0.8</sub> OOH | 1 M KOH | 235 | 34.7 | <i>Nat. Energy</i> <b>2019</b> , 4,<br>329-338   |
| NiCo LDHs                               | 1 M KOH | 334 | 41   | <i>Nat. Commun.</i> <b>2014</b> ,<br>5, 4477.    |

---
